# Supplementary material for: Hydrothermal synthesis of gold polyhedral nanocrystals by varying surfactant concentration and their LSPR and SERS properties
Source: Royal Society of Chemistry journal article supplement (doi:10.1039/c5ra10781d), 2015-01-01
Supplement: c5ra10781d1.pdf [file c5ra10781d1.pdf]

## Electronic Supplementary Information

### Hydrothermal Synthesis of Gold Nanocrystals by Varying Surfactant Concentration and Their LSPR and SERS Properties

Yanting Liu,<sup>a</sup> Jun Zhou,<sup>a,\*</sup> Xiaocong Yuan,<sup>b</sup> Tao Jiang,<sup>a</sup> Lucia Petti,<sup>c</sup> Lu Zhou,<sup>a</sup> and Pasquale Mormile<sup>c</sup>

<sup>a</sup> Institute of Photonics, Faculty of Science, Ningbo University, Ningbo, 315211, Zhejiang, China

Tel: +86-574-87600794; Fax: +86-574-87600744; E-mail: [zhoujun@nbu.edu.cn](mailto:zhoujun@nbu.edu.cn)

<sup>b</sup> Institute of Micro & Nano Optics, Shenzhen University, Shenzhen, 518060, China

<sup>c</sup> Institute of Cybernetics "E. Caianiello" of CNR, Via Campi Flegrei 34, 80072 Pozzuoli, Italy

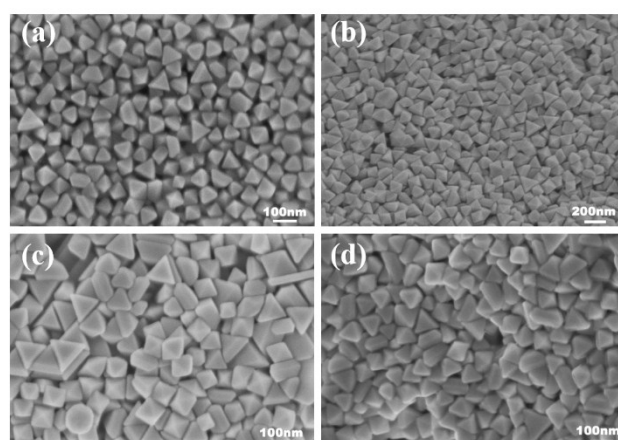

**Fig. S1** SEM images of the Au NCs synthesized with the concentrations of CTAB: (a) 10.5 mM, (b) 9 mM, (c) 7.5 mM and (d) 6 mM.

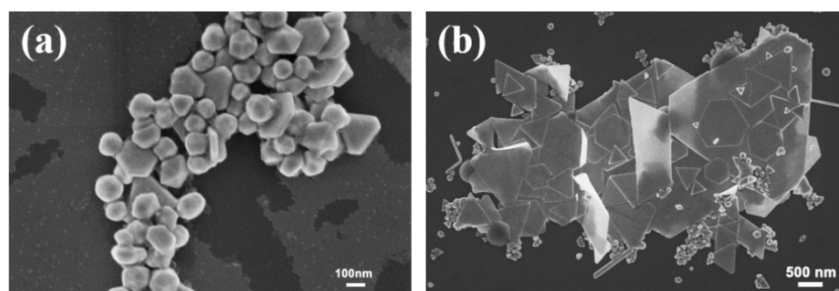

**Fig. S2** SEM images of Au NCs synthesized with extremely low concentrations of CTAB: (a) small triangular plates (3 mM, CTAB /Au = 15) and (b) large triangular and hexagonal plates (1.5 mM, CTAB /Au = 7.5)

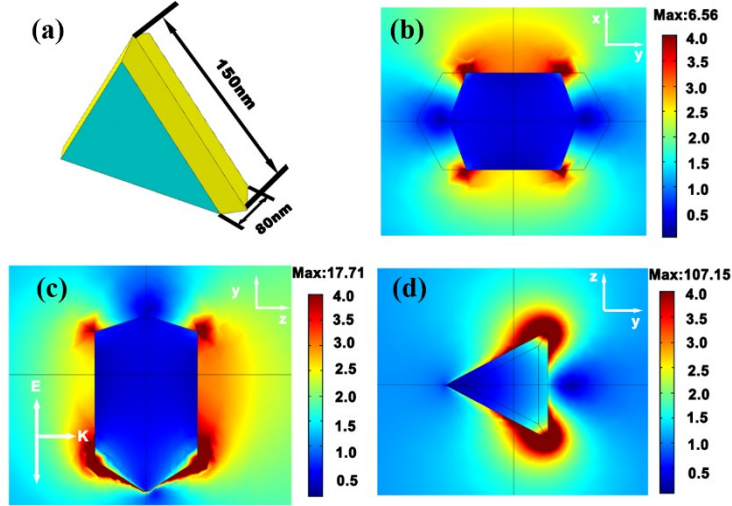

**Fig. S3.** (a) 3D model of the truncated Au bitetrahedron and the corresponding distributions of near-field enhancement in the tangent planes along (a) x-y plane, (b) x-z plane and (c) y-z plane.

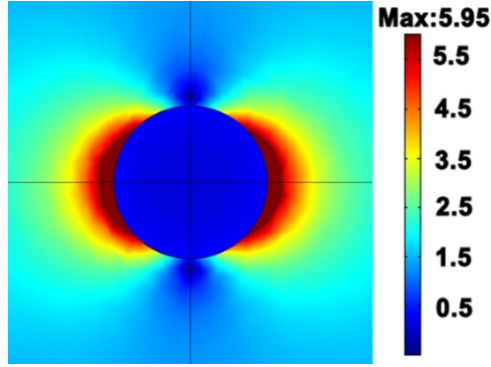

**Fig. S4** Calculated near-field distributions in the central tangent plane of Au nanosphere with diameter 80nm

### Analytical SERS enhancement factors (EFs) calculation

The calculation of SERS enhancement factors is followed the equation:  $EF = (I_{SERS}/I_{bulk}) \times (N_{bulk}/N_{SERS})$  where  $I_{SERS}$  and  $I_{bulk}$  are the integrated intensities of a characteristic band from SERS and from bulk Raman, respectively;  $N_{bulk}$  is the number of bulk molecules probed in the bulk sample; and  $N_{SERS}$  is the number of excited molecules adsorbed on the SERS substrate. The Raman spectrum of the 4-MBA solution (10 mM) was used to estimate the “bulk” values in the EF equation. The diameter of illumination focus of the  $2.39 \mu\text{m}$  was first calculated using the following formula:  $D_{diameter} = (\lambda/NA) \times 1.22$ , in which the  $NA = 0.4$  for the  $20\times$  objective lens of the Raman spectrometer at the 785 nm wavelength. Moreover, the penetration depth of laser beam is about  $6.86 \mu\text{m}$  in the solution. Then, the effective excitation volume was  $64.5 \mu\text{m}^3$  and the  $N_{bulk} = 3.89 \times 10^8$ . Next, with regard to the calculation of  $N_{SERS}$ , the excitation light of 785-nm wavelength was directly irradiated on the Au colloidal solution, so the effective excitation depth was assumed as a monolayer of NC in the Au colloidal solution. The effective excitation volume is:

$$V_{SERS} = \pi \left( \frac{D_{diameter}}{2} \right)^2 R,$$

where R represents the dimension of NCs. In our calculation, the polyhedral Au NC was assumed as a

nanosphere with radius of 43 nm. The number of absorbed 4-MBA molecule was estimated through the initial concentration of 4-MBA solution (20  $\mu$ l, 1mM). And 1 ml solution of the 4-MBA-labeled polyhedral Au NCs was transferred to a 2 mm quartz cuvette for SERS measurement. Therefore, the number of excited molecules equals to the effective excitation volume multiplies the initial volume density of molecular, i.e.  $N_{\text{SERS}} = V_{\text{SERS}} \times N_{\text{Initial}}/V_{\text{Initial}}$ . Then,  $N_{\text{SERS}} = 1.34 \times 10^3$  was obtained.

However, the above calculation process ignores the different surface areas between the polyhedral Au NCs samples. Hence, it is necessary to add a corrected factor to modify the  $N_{\text{SERS}}$  of nanosphere for the different kinds of polyhedral Au NCs. The corrected factor  $f$  is strongly dependent on the surface area of polyhedral Au NC and defined as follows<sup>S1, S2</sup>:

$$f = \left[ \frac{S_{\text{polyhedron}}}{S_{\text{sphere}}} \right]^2,$$

where  $S_{\text{polyhedron}}$  is the surface area of polyhedral Au NCs, and  $S_{\text{sphere}}$  the surface area of nanosphere. For high degree Au polygon, the corrected factor is calculated as  $f_1 \approx 0.91$ ; (2) For Au truncated cuboctahedron,  $f_2 \approx 0.82$ ; (3) For Au cuboctahedron,  $f_3 \approx 0.74$ . (4) For Au truncated octahedron,  $f_4 \approx 0.68$ ; (5) For Au truncated bitetrahedron and tetrahedron,  $f_5 \approx 0.53$ . Consequently, the number of excited molecules of the polyhedral Au NCs colloidal samples are given as  $N_1 = f \times N_{\text{SERS}} = 1.22 \times 10^3$ ,  $N_2 = 1.10 \times 10^3$ ,  $N_3 = 9.90 \times 10^2$ ,  $N_4 = 9.11 \times 10^2$  and  $N_5 = 7.78 \times 10^2$ , respectively. In addition, the values of  $I_{\text{bulk}}$  is  $4.87 \times 10^4$  and the values of  $I_{\text{SERS}}$  are  $I_1 = 8.25 \times 10^5$ ,  $I_2 = 1.29 \times 10^5$ ,  $I_3 = 1.31 \times 10^5$ ,  $I_4 = 1.34 \times 10^5$ , and  $I_5 = 1.67 \times 10^5$ , respectively. Thus, the EF values of the polyhedral Au NCs colloidal samples are given as  $EF_1 = 7.51 \times 10^5$ ,  $EF_2 = 9.15 \times 10^5$ ,  $EF_3 = 1.01 \times 10^6$ ,  $EF_4 = 1.10 \times 10^6$ ,  $EF_5 = 1.29 \times 10^6$ .

#### Reference:

- [S1] Q. Zhang, N. Large and H. Wang, *ACS Appl. Mater. Interfaces*, 2014, **6**, 17255–17267.  
 [S2] V. S. Tiwari, T. Oleg, G. K. Darbha, W. Hardy, J. P. Singh and P. C. Ray, *J. Phys. Chem. Lett.*, 2007, **446**, 77–82.
